# Supplementary material for: Rapid and robust evolution of collateral sensitivity in Pseudomonas aeruginosa antibiotic-resistant mutants
Source: PubMed Central journal article supplement — Sci Adv. 2020 Aug 5;6(32):eaba5493. doi: 10.1126/sciadv.aba5493 (PMC7406369; doi:10.1126/sciadv.aba5493), 2020-08-05
Supplement: aba5493_SM.pdf [file aba5493_SM.pdf]

## Supplementary Materials for

### **Rapid and robust evolution of collateral sensitivity in *Pseudomonas aeruginosa* antibiotic-resistant mutants**

Sara Hernando-Amado\*, Fernando Sanz-García, José Luis Martínez\*

\*Corresponding author. Email: [jlmtnz@cnb.csic.es](mailto:jlmtnz@cnb.csic.es) (J.L.M.); [shernando@cnb.csic.es](mailto:shernando@cnb.csic.es) (S.H.-A.)

Published 5 August 2020, *Sci. Adv.* **6**, eaba5493 (2020)  
DOI: 10.1126/sciadv.aba5493

#### **This PDF file includes:**

Fig. S1  
Tables S1 to S6

## Supplementary information

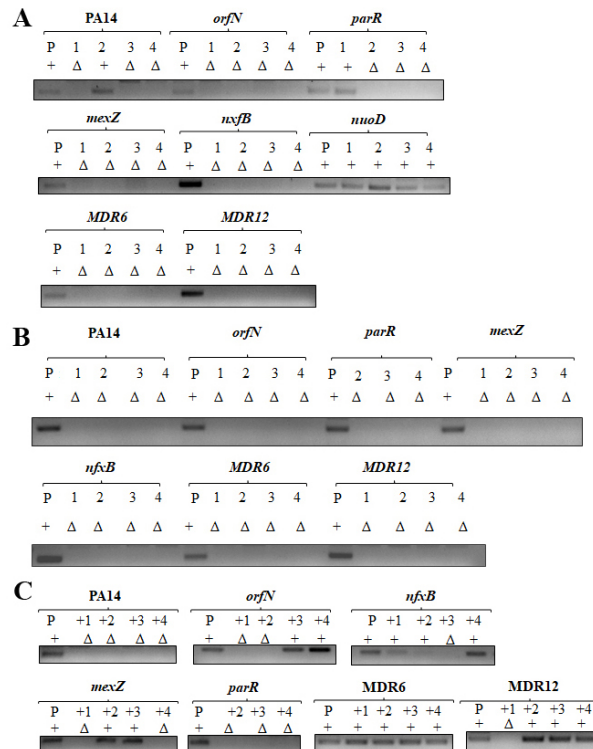

**Supplementary Figure S1. *mexXY* genotype of *P. aeruginosa* populations or individual clones analysed during this work.** Presence or absence of chromosomal deletions was determined by absence ( $\Delta$ ) or presence (+) of a 163 bp PCR fragment corresponding to *mexXY* in 2% agarose gel. Primers used for *mexXY* genotyping are included in Supplementary Table S6. **(A)** Chromosomal deletions (including *mexXY*) are selected at first stages of ceftazidime evolution in most of the *P. aeruginosa* genetic backgrounds analysed. **(B)** *mexXY* genotype of pyomelanogenic clones isolated from different genetic backgrounds of *P. aeruginosa* after ceftazidime short-term evolution. **(C)** *mexXY* genotype of heterogeneous pyomelanogenic populations from different genetic backgrounds of *P. aeruginosa* after tobramycin/ceftazidime sequential evolution.

**Supplementary Table S1 | *P. aeruginosa* PA14 mutants used in this work.**

| Type of mutant  | Mutant         | Protein<br>(aa change)                                                                                                                                       | Antibiotic selection | Reference |
|-----------------|----------------|--------------------------------------------------------------------------------------------------------------------------------------------------------------|----------------------|-----------|
| <b>Single</b>   | <i>nfxB177</i> | NfxB (Phe177Ser)                                                                                                                                             | TGC                  | (16)      |
|                 | <i>parR87</i>  | ParR (Glu87Lys)                                                                                                                                              | TGC                  | (36)      |
|                 | <i>mexZ43</i>  | MexZ (Val43Gly)                                                                                                                                              | TOB                  | (16)      |
|                 | <i>orfN50</i>  | OrfN (Val50fs)                                                                                                                                               | TGC<br>TOB           | (16, 36)  |
|                 | <i>nuoD184</i> | NuoD (Gln184*)                                                                                                                                               | TOB                  | (16)      |
| <b>Multiple</b> | MDR6           | NfxB (Leu10fs),<br>PhoQ (Val260Gly),<br>Frr (Ile98Ser), PmrB<br>(Leu87Gln)                                                                                   | TGC                  | (16)      |
|                 | MDR12          | FusA (Tyr552Cys;<br>Tyr683Cys), OrfN<br>(Val50fs), PmrB<br>(Met46Ile), MexZ<br>(Val43Gly), Gabp<br>(Ile263Ser266del),<br>PtsP (Leu537Pro),<br>NuoD (Gln184*) | TOB                  | (16)      |

Amino acid (aa) location of the mutations. Fs: frameshift. Del: deletion. \*: stop. TGC: tigecycline. TOB: tobramycin.

**Supplementary Table S2 | MICs ( $\mu\text{g/ml}$ ) of ceftazidime and tobramycin for *P. aeruginosa* populations after short-term evolution in the presence or absence of ceftazidime.**

| Parental strain                               | Replicate 1 |      | Replicate 2 |      | Replicate 3 |      | Replicate 4 |      |
|-----------------------------------------------|-------------|------|-------------|------|-------------|------|-------------|------|
|                                               | CAZ         | TOB  | CAZ         | TOB  | CAZ         | TOB  | CAZ         | TOB  |
| <b>PA14</b> <sup>a, b *</sup>                 | 8           | 0.5  | 12          | 0.25 | 8           | 0.5  | 24          | 0.5  |
| <i>nfxB177</i> <sup>a, b *</sup>              | 6           | 0.38 | 8           | 0.38 | 6           | 0.5  | 8           | 0.38 |
| <i>parR87</i> <sup>a, b</sup>                 | 6           | 4    | >256        | 0.5  | >256        | 0.5  | >256        | 0.5  |
| <i>orfN50</i> <sup>a, b **</sup>              | 24          | 0.38 | 24          | 0.75 | 24          | 0.38 | 12          | 0.5  |
| <b>CAZ (+)</b> <i>nuoD184</i> <sup>a, b</sup> | 12          | 1.5  | 8           | 2    | 8           | 3    | 8           | 1.5  |
| <i>mexZ43</i> <sup>a, b **</sup>              | 6           | 0.25 | 48          | 0.5  | 6           | 0.38 | 3           | 0.5  |
| <b>MDR6</b> <sup>a, b **</sup>                | 12          | 0.38 | 8           | 0.5  | 8           | 0.5  | 12          | 0.38 |
| <b>MDR12</b> <sup>a, b **</sup>               | 48          | 3    | 48          | 3    | 6           | 3    | 48          | 3    |
| <b>CAZ (-)</b> <b>PA14</b> <sup>a, b</sup>    | 1           | 1.5  | 1           | 1.5  | 0.75        | 1.5  | 1           | 1.5  |
| <i>nfxB177</i> <sup>a, b</sup>                | 1           | 1    | 1.5         | 1    | 1           | 1    | 1           | 1    |
| <i>parR87</i> <sup>a, b</sup>                 | 1           | 1.5  | 1           | 1.5  | 1           | 1.5  | 1           | 1.5  |
| <i>orfN50</i> <sup>a, b</sup>                 | 3           | 3    | 3           | 3    | 3           | 3    | 3           | 2    |
| <i>nuoD184</i> <sup>a, b</sup>                | 1.5         | 2    | 1.5         | 2    | 1           | 2    | 1.5         | 1.5  |
| <i>mexZ43</i> <sup>a, b</sup>                 | 1           | 1.5  | 1           | 1.5  | 1           | 1.5  | 1           | 1.5  |
| <b>MDR6</b> <sup>a, b</sup>                   | 0.75        | 1.5  | 1           | 1.5  | 0.75        | 2    | 0.75        | 1.5  |
| <b>MDR12</b> <sup>a, b</sup>                  | 0.75        | 48   | 1           | 32   | 1           | 32   | 1           | 32   |

CAZ: ceftazidime. TOB: tobramycin.

Four different replicates of each genetic background were submitted to short-term evolution in the presence (+) or absence (-) of ceftazidime and the tobramycin MIC values measured. Asterisks indicate genetic backgrounds showing a significant change

of tobramycin MIC after ceftazidime treatment according to a bilateral Dunnet's *post hoc* test using the  $\log_2$  of fold change with respect to each parental strain (\*  $P < 0.01$ , \*\*  $P < 0.001$ ).

<sup>a</sup> CAZ MIC ( $\mu\text{g/ml}$ ) of parental strains PA14, 1; *nfxB177*, 1.5; *parR87*, 1; *orfN50*, 3; *nuoD184*, 1; *mexZ43*, 1; MDR6, 1.5; MDR12, 1.

<sup>b</sup> TOB MIC ( $\mu\text{g/ml}$ ) of parental strains PA14, 1; *nfxB177*, 1; *parR87*, 1.5; *orfN50*, 3; *nuoD184*, 2; *mexZ43*, 1.5; MDR6, 2; MDR12, 32.

**Supplementary Table S3 | MICs ( $\mu\text{g/ml}$ ) of ceftazidime and tobramycin of pyomelanogenic clones isolated from *P. aeruginosa* populations after ceftazidime short-term evolution.**

|                                          | Clone 1 |      | Clone 2 |      | Clone 3 |      | Clone 4 |      |
|------------------------------------------|---------|------|---------|------|---------|------|---------|------|
|                                          | CAZ     | TOB  | CAZ     | TOB  | CAZ     | TOB  | CAZ     | TOB  |
| <b>PA14</b> <sup>a, b **</sup>           | 8       | 0.38 | 8       | 0.38 | 8       | 0.25 | 8       | 0.38 |
| <b><i>nfxB177</i></b> <sup>a, b **</sup> | 8       | 0.5  | 8       | 0.5  | 8       | 0.5  | 8       | 0.5  |
| <b><i>parR87</i></b> <sup>a, b **</sup>  | -       | -    | >256    | 0.5  | >256    | 0.38 | >256    | 0.38 |
| <b><i>orfN50</i></b> <sup>a, b **</sup>  | 24      | 0.5  | 24      | 0.5  | 12      | 0.38 | 16      | 0.5  |
| <b><i>mexZ43</i></b> <sup>a, b **</sup>  | 8       | 0.38 | 8       | 0.38 | 6       | 0.38 | 4       | 0.38 |
| <b>MDR6</b> <sup>a, b **</sup>           | 12      | 0.5  | 12      | 0.5  | 8       | 0.75 | 12      | 0.5  |
| <b>MDR12</b> <sup>a, b **</sup>          | 8       | 1.5  | 6       | 2    | 4       | 3    | 6       | 2    |

CAZ: ceftazidime. TOB: tobramycin.

Asterisks indicate pyomelanogenic genetic backgrounds showing a significant change in tobramycin MIC with respect to their parental strain according to Dunnet's bilateral *post hoc* test (\*\*  $P < 0.001$ ).

<sup>a</sup> CAZ MIC ( $\mu\text{g/ml}$ ) of parental strains PA14, 1; *nfxB177*, 1.5; *parR87*, 1; *orfN50*, 3; *mexZ43*, 1; MDR6, 1.5; MDR12, 1.

<sup>b</sup> TOB MIC ( $\mu\text{g/ml}$ ) of parental strains PA14, 1; *nfxB177*, 1; *parR87*, 1.5; *orfN50*, 3; *mexZ43*, 1.5; MDR6, 2; MDR12, 32.

**Supplementary Table S4 | MICs ( $\mu\text{g/ml}$ ) of ceftazidime and tobramycin for heterogeneous pyomelanogenic populations of *P. aeruginosa* after tobramycin and ceftazidime sequential evolution.**

|                              |                               | <b>+1<sup>b</sup></b> |            | <b>+2<sup>b</sup></b> |            | <b>+3<sup>b</sup></b> |            | <b>+4<sup>b</sup></b> |            |
|------------------------------|-------------------------------|-----------------------|------------|-----------------------|------------|-----------------------|------------|-----------------------|------------|
|                              |                               | <b>CAZ</b>            | <b>TOB</b> | <b>CAZ</b>            | <b>TOB</b> | <b>CAZ</b>            | <b>TOB</b> | <b>CAZ</b>            | <b>TOB</b> |
| <b>First step<br/>(TOB)</b>  | <b>PA14<sup>a, c</sup></b>    | 1                     | 32         | 0.75                  | 6          | 2                     | 24         | 1.5                   | 16         |
|                              | <i>nfxB177<sup>a, c</sup></i> | 0.5                   | 4          | 0.75                  | 48         | 1                     | 4          | 1                     | 16         |
|                              | <i>parR87<sup>a, c</sup></i>  | -                     | -          | 1                     | 16         | 1                     | 16         | 1                     | 32         |
|                              | <i>orfN50<sup>a, c</sup></i>  | 3                     | 48         | 2                     | 64         | 2                     | 64         | 1.5                   | 8          |
|                              | <i>mexZ43<sup>a, c</sup></i>  | 1                     | 32         | 1                     | 16         | 1                     | 24         | 0.75                  | 24         |
|                              | <b>MDR6<sup>a, c</sup></b>    | 0.75                  | 8          | 2                     | 8          | 2                     | 4          | 1.5                   | 8          |
|                              | <b>MDR12<sup>a, c</sup></b>   | 0.75                  | 32         | 2                     | 64         | 2                     | 96         | 1.5                   | 96         |
| <b>Second step<br/>(CAZ)</b> | <b>PA14<sup>**</sup></b>      | 6                     | 0.25       | 4                     | 1          | 16                    | 0.38       | 8                     | 0.75       |
|                              | <i>nfxB177<sup>*</sup></i>    | 3                     | 0.75       | 4                     | 1          | 6                     | 0.75       | 8                     | 1          |
|                              | <i>parR87<sup>*</sup></i>     | -                     | -          | 8                     | 2          | 4                     | 0.75       | 6                     | 2          |
|                              | <i>orfN50<sup>*</sup></i>     | 6                     | 0.5        | 6                     | 1          | 4                     | 12         | 48                    | 1.5        |
|                              | <i>mexZ43<sup>*</sup></i>     | 8                     | 0.75       | 4                     | 1.5        | 4                     | 4          | 6                     | 0.75       |
|                              | <b>MDR6</b>                   | 6                     | 6          | 16                    | 2          | 8                     | 2          | 4                     | 2          |
|                              | <b>MDR12</b>                  | 6                     | 3          | 16                    | 48         | 32                    | 96         | 12                    | 64         |

TOB: tobramycin. CAZ: ceftazidime.

Heterogeneous pyomelanogenic populations (dubbed +1, +2, +3 and +4) were constructed by mixing each of the 27 pyomelanogenic clones with its parental strain, in a 1:1 ratio. Extinction of pyomelanogenic populations after first step on tobramycin was determined by comparing the CAZ MIC value of each heterogeneous population with the ones of parental strains and pyomelanogenic clones. Asterisks indicate populations

showing a significant difference in tobramycin MIC between the first and second step of sequential evolution according to Dunnett's *post hoc* test (\* $P < 0.01$ ; \*\* $P < 0.001$ ).

<sup>a</sup> CAZ MIC ( $\mu\text{g/ml}$ ) of parental strains: PA14, 1; *nfxB177*, 1.5; *parR87*, 1; *orfN50*, 3; *mexZ43*, 1; MDR6, 1.5; MDR12, 1.

<sup>b</sup> CAZ MIC ( $\mu\text{g/ml}$ ) of pyomelanogenic clones: PA14 (from 1 to 4), 8; *nfxB177* (from 1 to 4), 8; *parR87* (from 2 to 4), >256; *orfN50* (1, 2, 3 and 4), 24, 24, 12 and 16, respectively; *mexZ43* (1, 2, 3 and 4), 8, 8, 6 and 4, respectively; MDR6 (1, 2, 3 and 4), 12, 12, 8 and 12, respectively; MDR12 (1, 2, 3 and 4), 8, 6, 4 and 6, respectively.

<sup>c</sup> TOB MIC ( $\mu\text{g/ml}$ ) of parental strains PA14, 1; *nfxB177*, 1; *parR87*, 1.5; *orfN50*, 3; *mexZ43*, 1.5; MDR6, 2; MDR12, 32.



**Supplementary Table S5 | MICs ( $\mu\text{g/ml}$ ) of antibiotics belonging to different structural families in the final populations of *P. aeruginosa* PA14 after tobramycin/ceftazidime sequential evolution.**

|                        | TGC | TET | CIP   | LEV  | CAZ | ATM | IPM  | FOF | ERY  | TOB  | AMK  | CHL  |
|------------------------|-----|-----|-------|------|-----|-----|------|-----|------|------|------|------|
| <b>PA14</b>            | 6   | 64  | 0.094 | 0.25 | 1   | 2   | 0.75 | 48  | 64   | 1    | 4    | 64   |
| <b>PA14+1</b>          | 8   | 64  | 0.5   | 1.5  | 6   | 96  | 1.5  | 6   | >256 | 0.25 | 0.75 | >256 |
| <b>PA14+2</b>          | 2   | 12  | 0.125 | 0.25 | 4   | 8   | 4    | 6   | >256 | 1    | 4    | >256 |
| <b>PA14+3</b>          | 8   | 64  | 0.25  | 1    | 16  | 32  | 0.75 | 8   | >256 | 0.38 | 1    | >256 |
| <b>PA14+4</b>          | 2   | 12  | 0.125 | 0.25 | 8   | 12  | 12   | 6   | >256 | 0.75 | 2    | >256 |
| <b><i>parR87</i></b>   | 8   | 24  | 0.125 | 0.5  | 1   | 3   | 2    | 32  | >256 | 1.5  | 8    | 64   |
| <b><i>parR87+2</i></b> | 3   | 12  | 0.19  | 0.38 | 8   | 12  | 16   | 4   | >256 | 2    | 12   | 192  |
| <b><i>parR87+3</i></b> | 12  | 12  | 0.19  | 0.5  | 4   | 48  | 16   | 12  | >256 | 0.75 | 2    | >256 |
| <b><i>parR87+4</i></b> | 2   | 12  | 0.125 | 0.5  | 6   | 12  | 24   | 4   | >256 | 2    | 8    | >256 |
| <b><i>orfN50</i></b>   | 32  | 48  | 0.19  | 0.38 | 3   | 8   | 2    | 8   | >256 | 3    | 12   | >256 |
| <b><i>orfN50+1</i></b> | 3   | 12  | 0.094 | 0.38 | 6   | 12  | 3    | 8   | >256 | 0.5  | 6    | >256 |
| <b><i>orfN50+2</i></b> | 3   | 8   | 0.094 | 0.25 | 6   | 16  | 6    | 3   | >256 | 1    | 4    | >256 |
| <b><i>orfN50+3</i></b> | 48  | 48  | 0.25  | 0.38 | 4   | 8   | 1    | 8   | >256 | 12   | 192  | >256 |

|                  |     |    |       |      |     |     |     |    |      |      |      |      |
|------------------|-----|----|-------|------|-----|-----|-----|----|------|------|------|------|
| <i>orfN50+4</i>  | 32  | 48 | 0.19  | 0.75 | 48  | 48  | 1.5 | 8  | >256 | 1.5  | 16   | >256 |
| <i>nfxB177</i>   | 32  | 48 | 3     | 4    | 1.5 | 2   | 1   | 32 | >256 | 1    | 2    | >256 |
| <i>nfxB177+1</i> | 32  | 48 | 3     | 4    | 3   | 12  | 1   | 48 | >256 | 0.75 | 3    | >256 |
| <i>nfxB177+2</i> | 16  | 24 | 0.125 | 0.38 | 4   | 16  | 8   | 32 | >256 | 1    | 8    | >256 |
| <i>nfxB177+3</i> | 16  | 24 | 2     | 4    | 6   | 16  | 16  | 12 | >256 | 0.75 | 4    | >256 |
| <i>nfxB177+4</i> | 48  | 48 | 0.25  | 0.5  | 8   | 24  | 12  | 6  | >256 | 1    | 32   | >256 |
| <i>mexZ43</i>    | 8   | 24 | 0.38  | 0.5  | 1   | 3   | 1.5 | 32 | >256 | 1.5  | 8    | 48   |
| <i>mexZ43+1</i>  | 4   | 24 | 0.38  | 1    | 8   | 32  | 8   | 8  | >256 | 0.75 | 1.5  | >256 |
| <i>mexZ43+2</i>  | 8   | 24 | 0.38  | 0.75 | 4   | 2   | 8   | 8  | >256 | 1.5  | >256 | >256 |
| <i>mexZ43+3</i>  | 96  | 48 | 0.75  | 2    | 4   | 16  | 2   | 24 | >256 | 4    | 16   | >256 |
| <i>mexZ43+4</i>  | 4   | 24 | 0.25  | 1    | 6   | 32  | 24  | 8  | >256 | 0.75 | 2    | >256 |
| <b>MDR6</b>      | 48  | 32 | 0.19  | 0.38 | 1.5 | 1.5 | 1.5 | 24 | >256 | 2    | 8    | 48   |
| <b>MDR6+1</b>    | 32  | 32 | 0.125 | 0.38 | 6   | 8   | 1   | 8  | >256 | 6    | 48   | >256 |
| <b>MDR6+2</b>    | 96  | 48 | 0.125 | 0.38 | 16  | 8   | 4   | 6  | >256 | 2    | 16   | >256 |
| <b>MDR6+3</b>    | 48  | 32 | 0.25  | 0.5  | 8   | 12  | 16  | 4  | >256 | 2    | 16   | >256 |
| <b>MDR6+4</b>    | 128 | 64 | 0.125 | 0.38 | 4   | 6   | 2   | 12 | >256 | 2    | 16   | >256 |

|                |      |    |       |      |    |    |     |    |      |    |      |      |
|----------------|------|----|-------|------|----|----|-----|----|------|----|------|------|
| <b>MDR12</b>   | 64   | 24 | 0.5   | 1    | 1  | 2  | 1.5 | 32 | >256 | 32 | >256 | 48   |
| <b>MDR12+1</b> | 2    | 6  | 0.094 | 0.38 | 6  | 12 | 4   | 16 | >256 | 3  | 8    | >256 |
| <b>MDR12+2</b> | >256 | 48 | 0.38  | 1.5  | 16 | 12 | 3   | 12 | >256 | 48 | >256 | >256 |
| <b>MDR12+3</b> | >256 | 48 | 0.75  | 1.5  | 32 | 32 | 3   | 12 | >256 | 96 | >256 | >256 |
| <b>MDR12+4</b> | >256 | 48 | 0.5   | 1.5  | 12 | 12 | 3   | 12 | >256 | 64 | >256 | >256 |

---

*Post-hoc* tests using Fisher's exact test with Hochberg correction for multiple comparisons showed that the observed trends towards sensitivity or resistance were significant in all cases ( $P < 0.0001$ ), except for erythromycin ( $P=0.8841$ ). Among the significance levels for antibiotics showing a predominant MIC reduction, fosfomicin presented the higher significance ( $P=0.0000000023$ ), followed by tobramycin ( $P=0.0000003482$ ) and tetracycline ( $P=0.0000630420$ ).

TGC: tigecycline, TET: tetracycline, CIP: ciprofloxacin, LEV: levofloxacin, CAZ: ceftazidime, ATM: aztreonam, IPM: imipenem, FOF: fosfomicin, ERY; erythromycin, TOB: tobramycin, AMK: amikacin, CHL: chloramphenicol.

**Supplementary Table S6 | Primers used in this study.**

| <b>Primer</b>        | <b>Sequence (5'-3')</b>      | <b>Description</b>                                |
|----------------------|------------------------------|---------------------------------------------------|
| <i>nfxB177.Fw</i>    | AAGCTTATGACCCTGATTTCCCATGA   | To amplify mutant allele of <i>nfxB</i> by PCR    |
| <i>nfxB177.Rv</i>    | AAGCTTTCGTTGAGACGATCGAGCTG   |                                                   |
| <i>parR87.Fw</i>     | AAGCTTCGCTCAAGCGCGGAAGTGCTTT | To amplify mutant allele of <i>parR</i> by PCR    |
| <i>parR87.Rv</i>     | AAGCTTCAGGTAGAGGCGCAGGAACA   |                                                   |
| <i>mexZ43.Fw</i>     | AAGCTTACGTCCTGGCCTTCCTCGTA   | To amplify mutant allele of <i>mexZ</i> by PCR    |
| <i>mexZ43.Rv</i>     | AAGCTTAACTGCGCAGGCTATCGAGG   |                                                   |
| <i>nuoD184.Fw</i>    | AAGCTTATGACTGCAGACTCCGCTCT   | To amplify mutant allele of <i>nuoD</i> by PCR    |
| <i>nuoD184.Rv</i>    | AAGCTTTCGGTGAAGGTGAAGAACAC   |                                                   |
| <i>lasR.Fw</i>       | AAGCTTAGCGCCATCCTGCAGAAGAT   | To amplify wild type allele of <i>lasR</i> by PCR |
| <i>lasR.Rv</i>       | AAGCTTGCCGACCAATTTGTACGATC   |                                                   |
| <i>mexXYgntyp.Fw</i> | GTACGAGGAAGGCCAGGAC          | To genotype <i>mexXY</i> by PCR                   |
| <i>mexXYgntyp.Rv</i> | CTTGATCAGGTCGGCGTAG          |                                                   |
